# Supplementary material for: Association between a genetic variant in the serotonin transporter gene (SLC6A4) and suicidal behavior in patients with schizophrenia
Source: PubMed Central journal article supplement (PMC3527134; doi:10.1186/1744-9081-8-24), 2012-05-17
Supplement: 1744-9081-8-24-S1.pdf [file 1744-9081-8-24-S1.pdf]

Figure S1. Linkage disequilibrium (LD) structure in the three Scandinavian control samples of seven serotonin transporter gene (*SLC6A4*) single nucleotide polymorphisms.

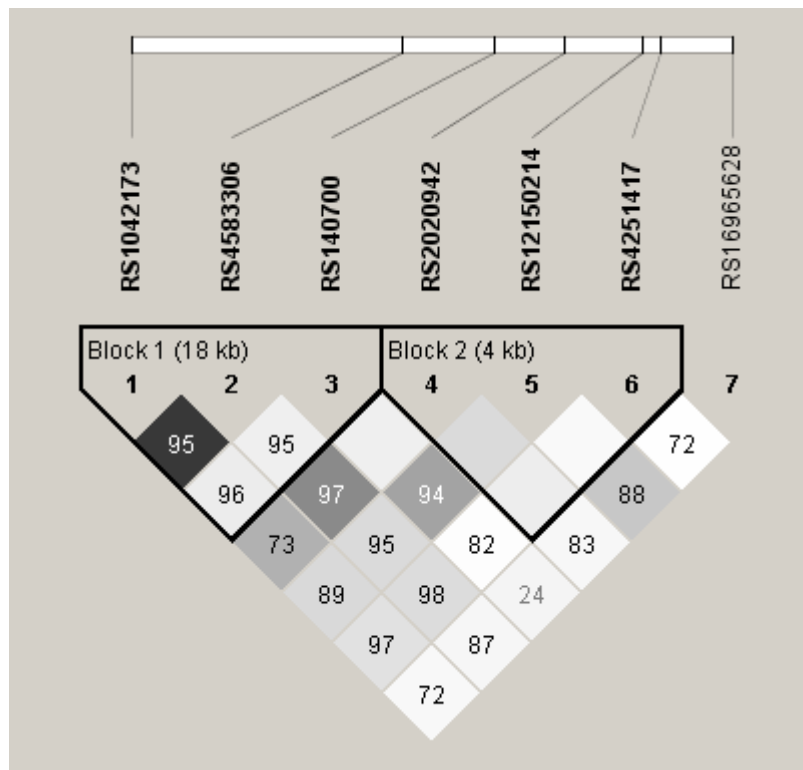

The figure shows pair-wise LD among the seven *SLC6A4* SNPs, as calculated by the Haploview 4.0 software. High  $D'$  values with strong linkage disequilibrium are indicated by dark color. Gray and white colors indicate weak linkages with low  $D'$  values. The genetic positions of the SNPs in the *SLC6A4* gene are indicated in the white bar above the LD-plot.
